# Supplementary material for: Drug Inhibition of Redox Factor-1 Restores Hypoxia-Driven Changes in Tuberous Sclerosis Complex 2 Deficient Cells
Source: MDPI journal article supplement (doi:10.3390/cancers14246195), 2022-12-15

Figure 1A

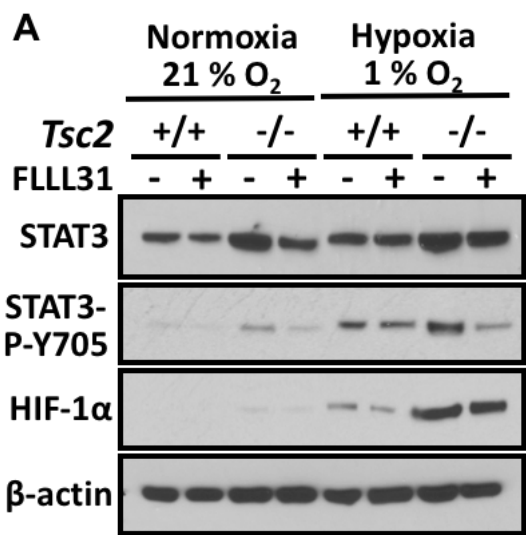

STAT3

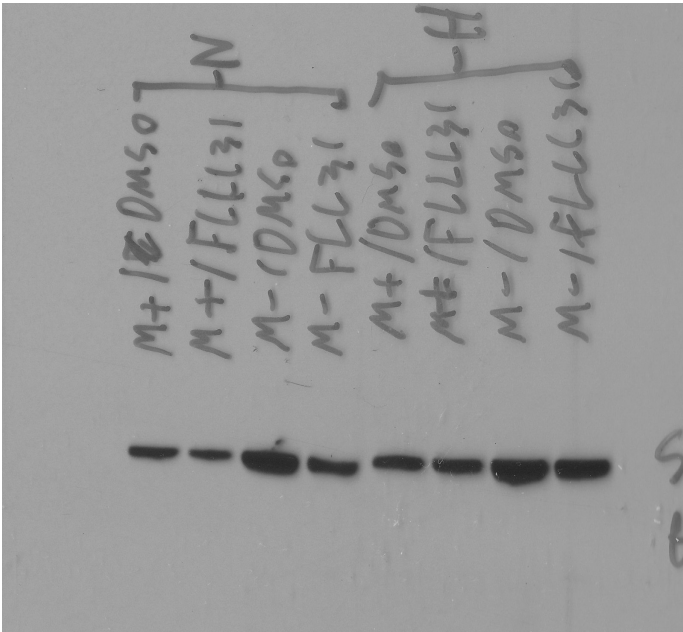

(P-Y705)-STAT3

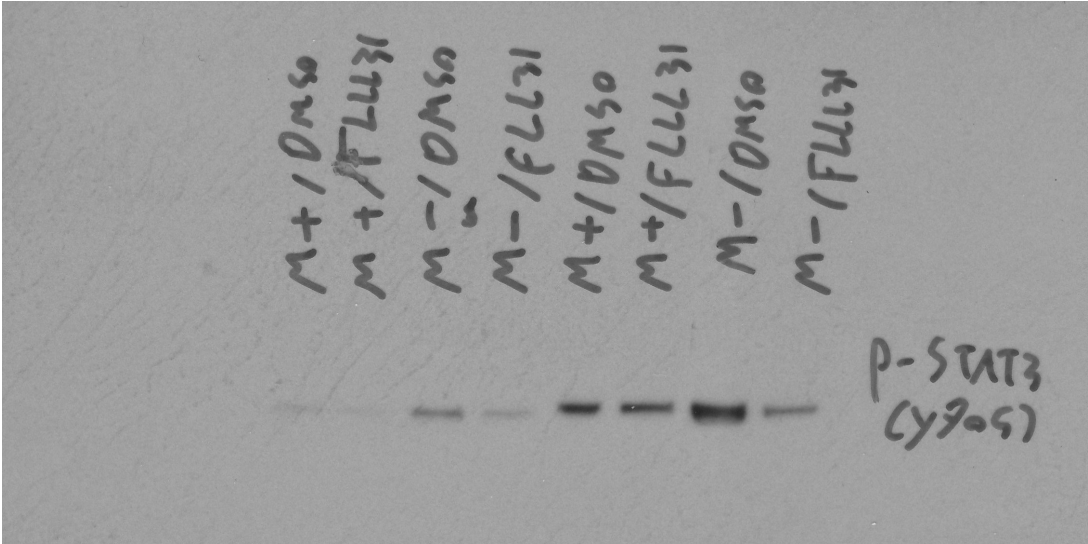

HIF-1 $\alpha$

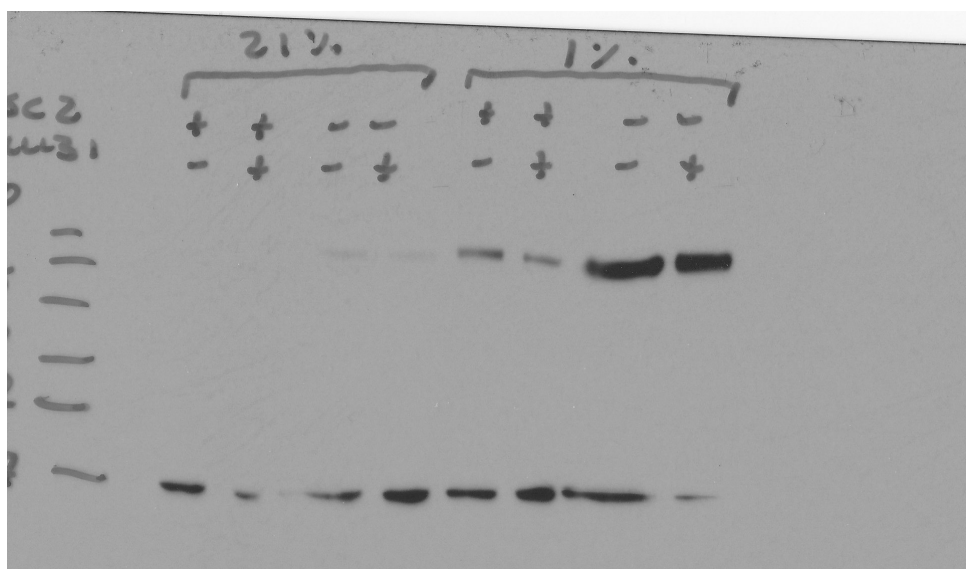

$\beta$ -actin

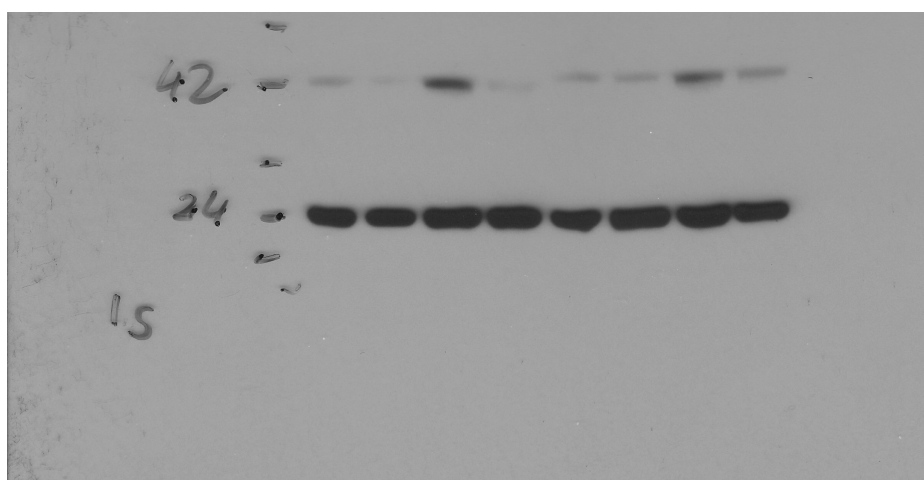

Figure 1E

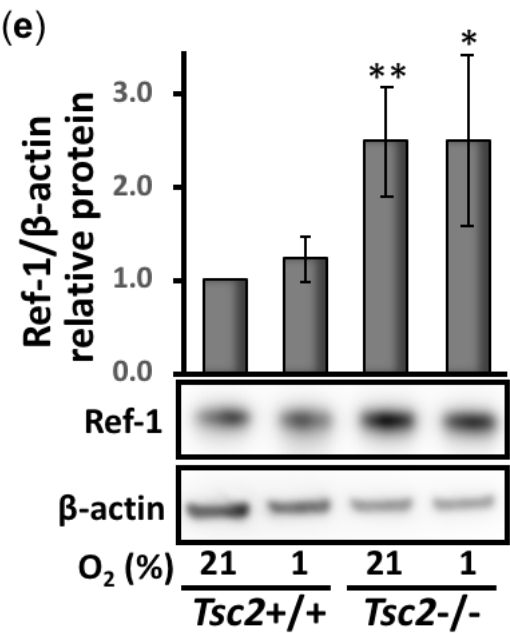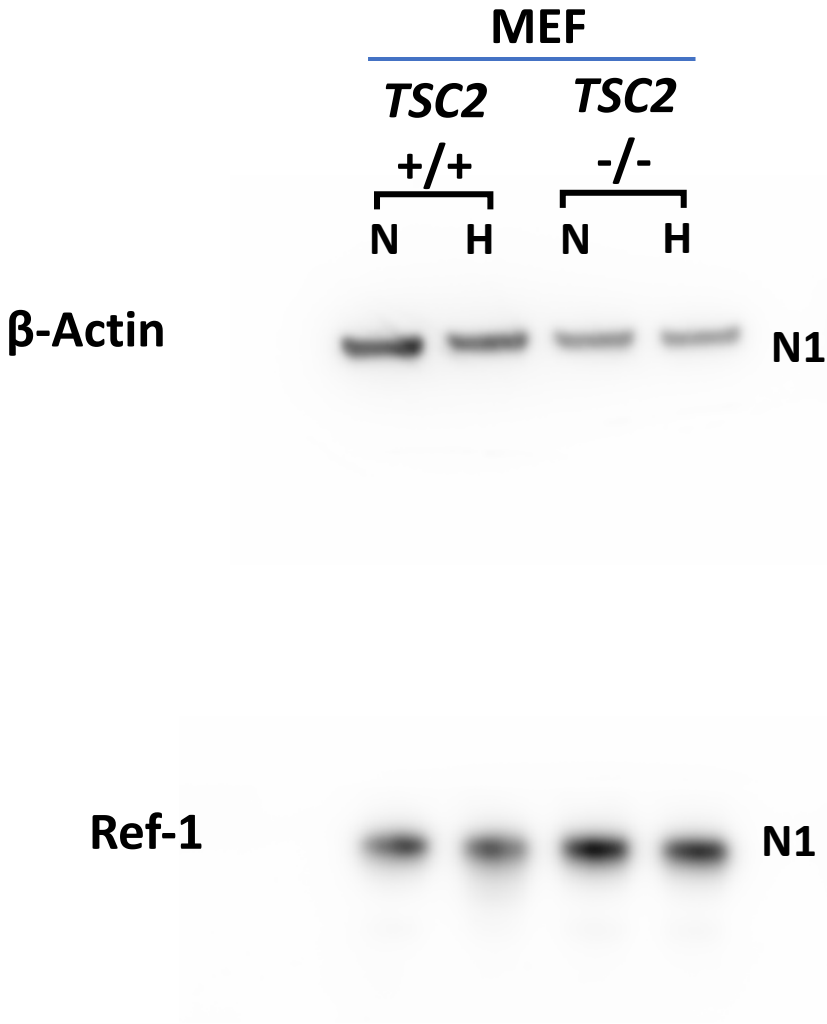

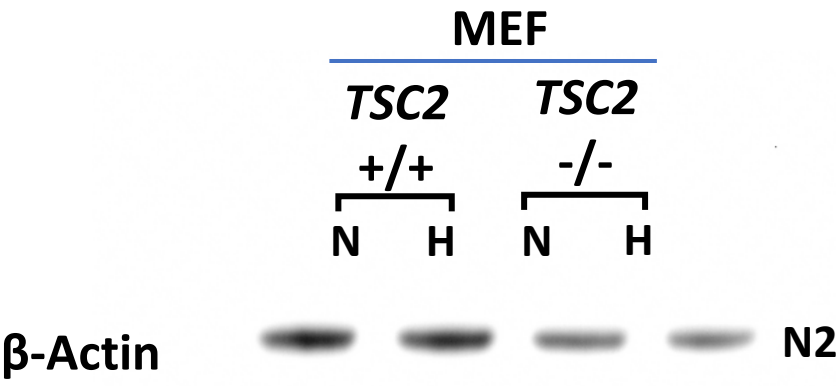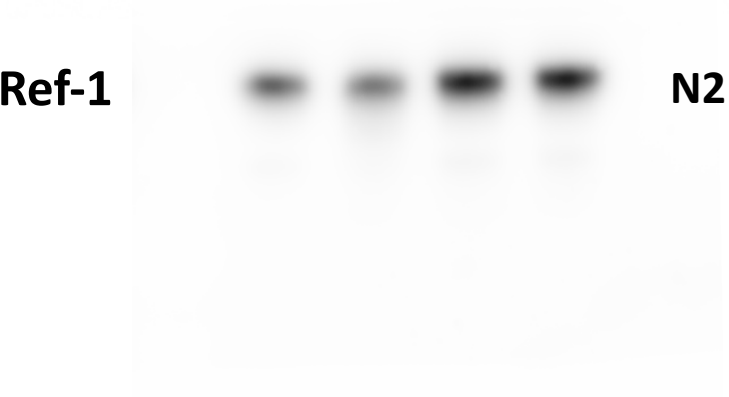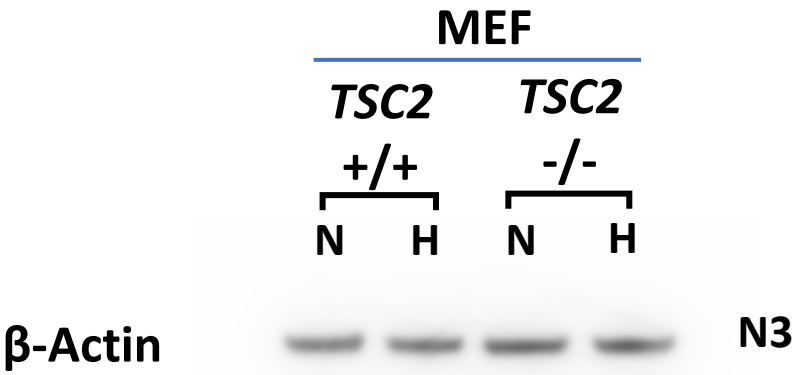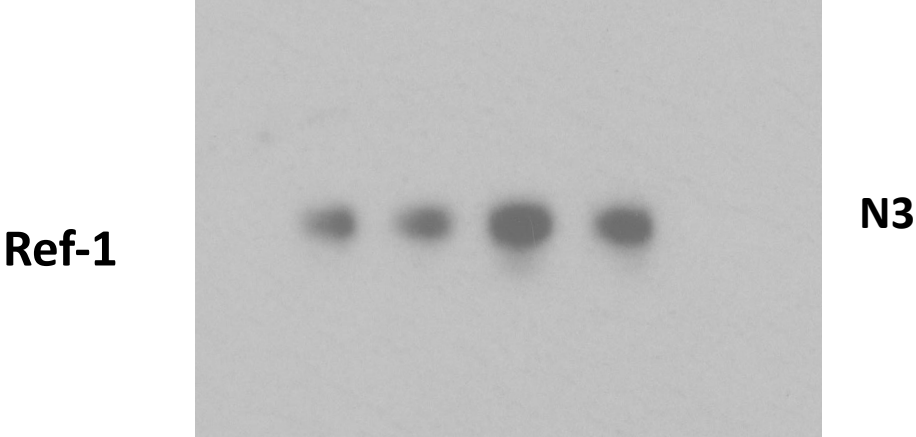



Figure 2D

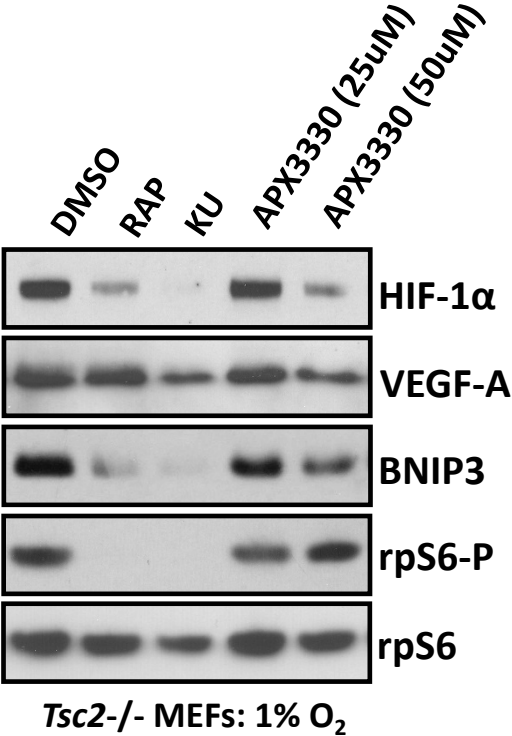

HIF-1α

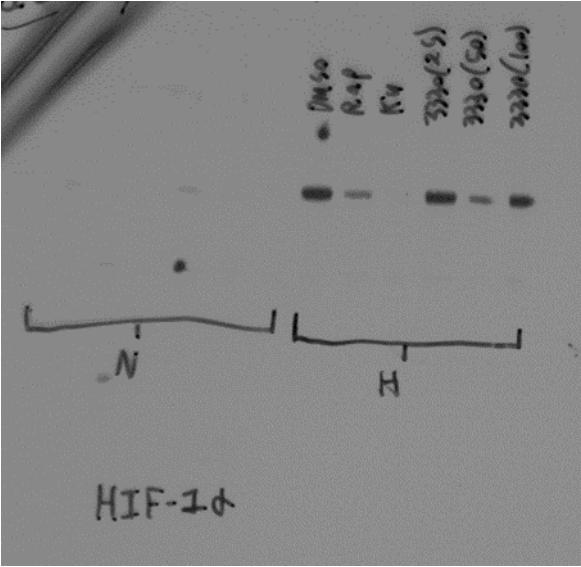

VEGF-A

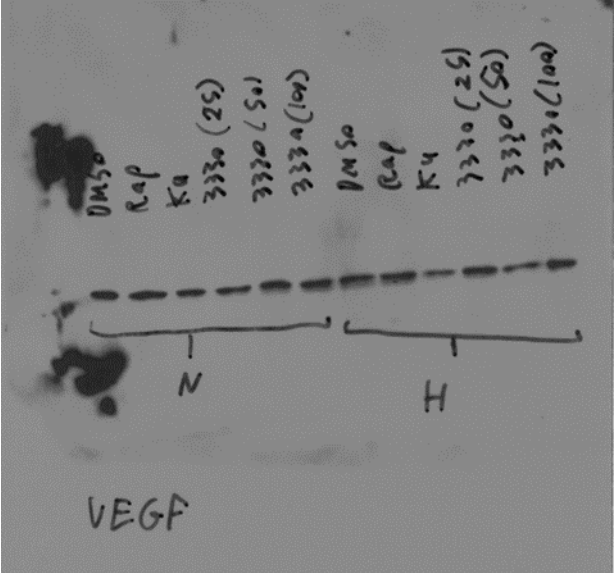

**BNIP3**

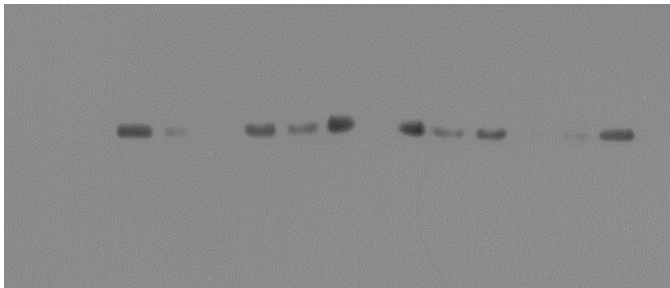

**rpS6-P**

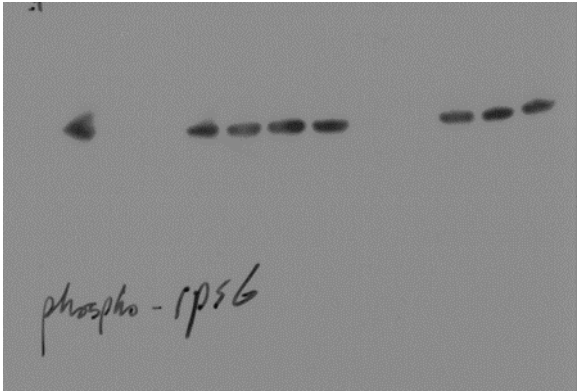

**rpS6**

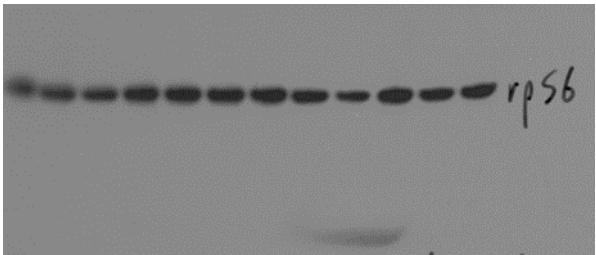

Figure 5

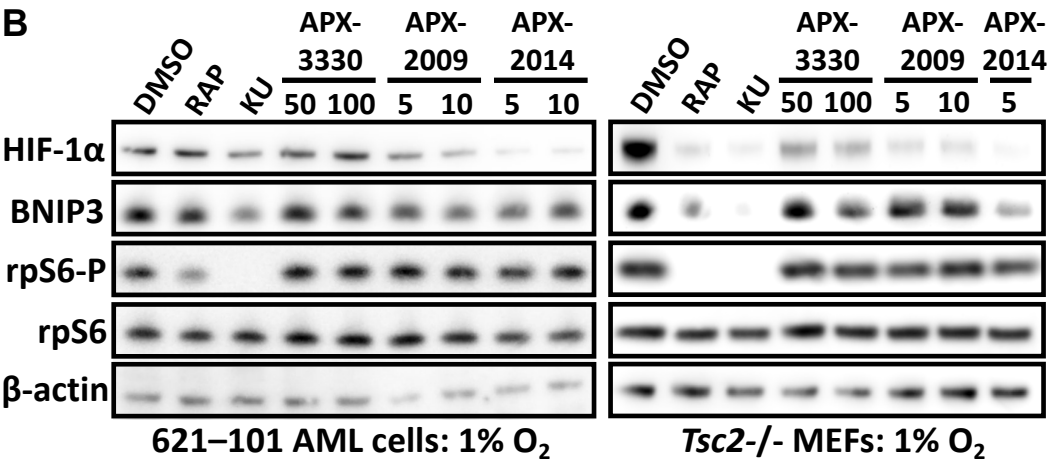

621-101 AML cells: 1% O<sub>2</sub>

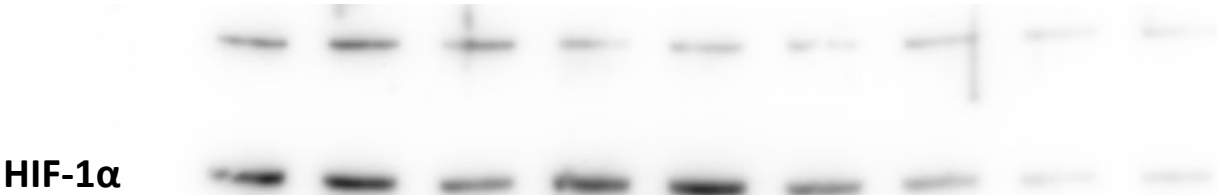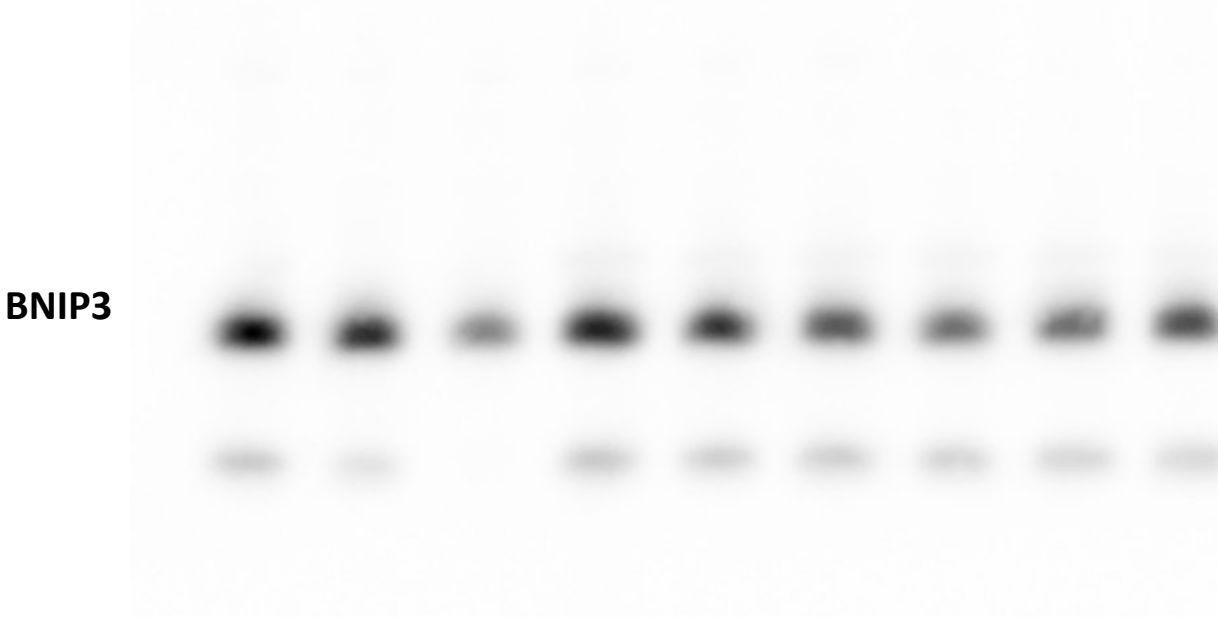

621-101 AML cells: 1% O<sub>2</sub>

rpS6-P

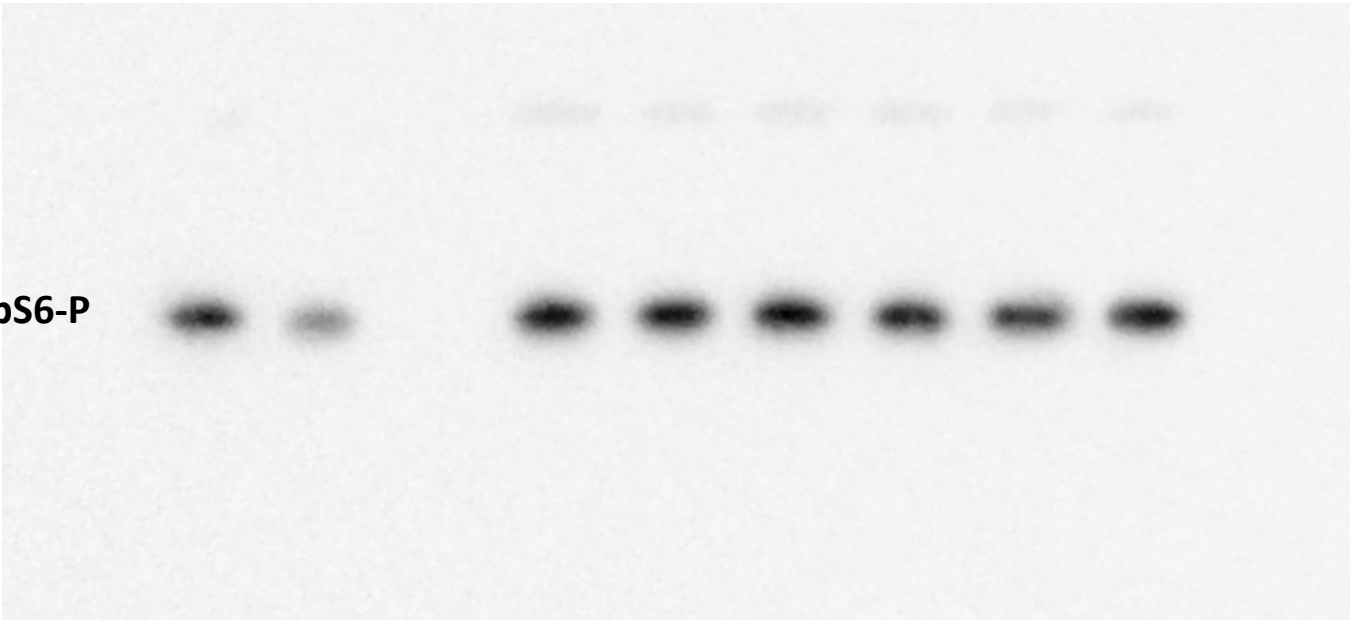

rpS6

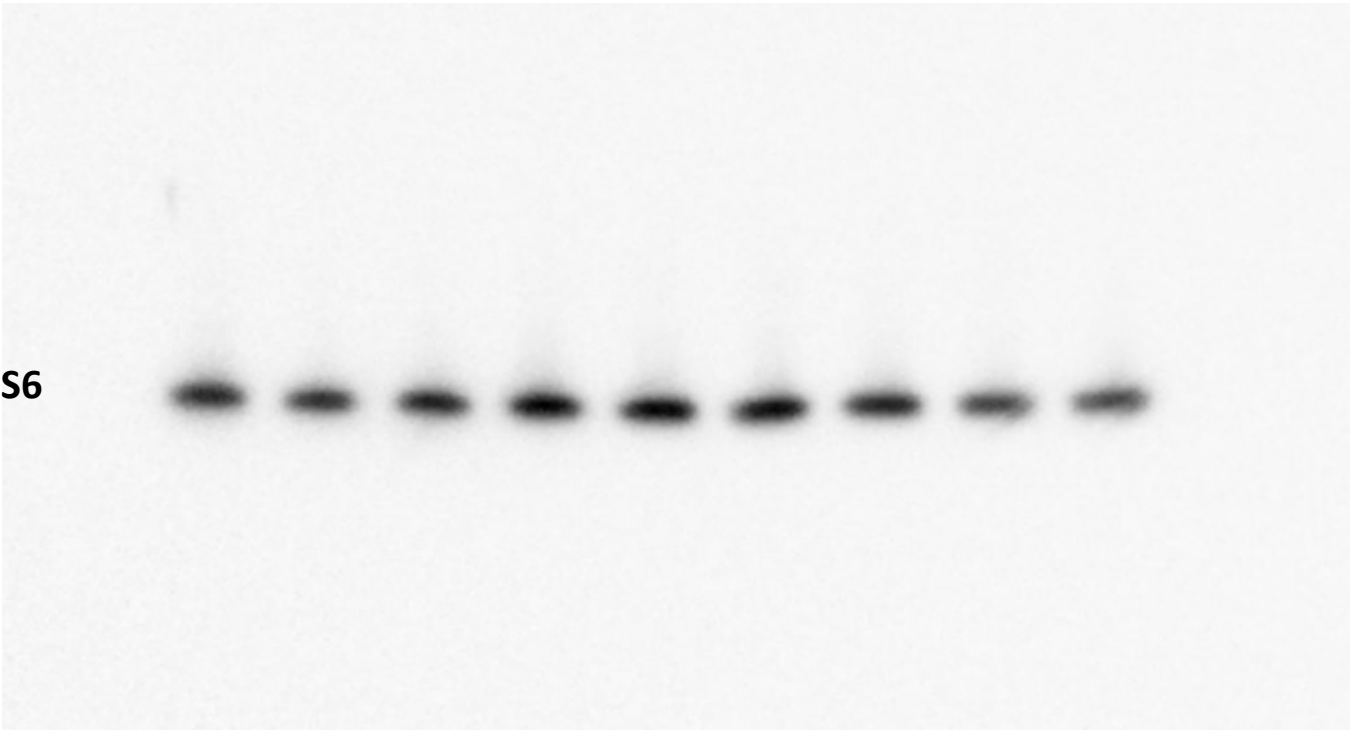

β-actin

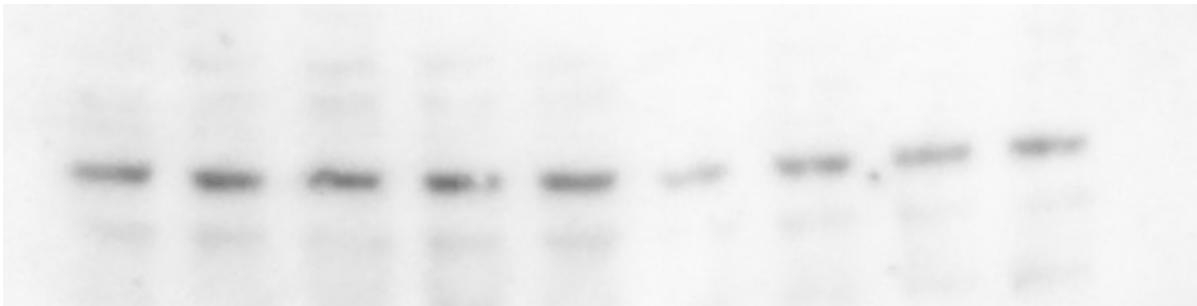

*Tsc2*<sup>-/-</sup> MEFs: 1% O<sub>2</sub>

HIF-1α

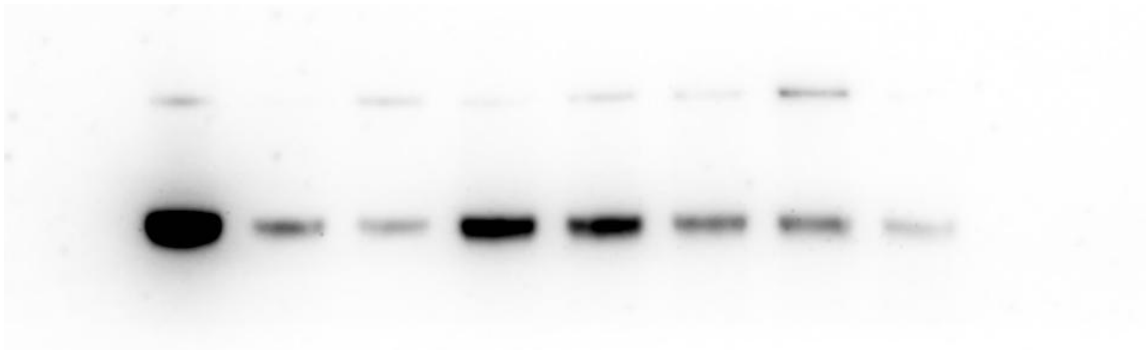

BNIP3

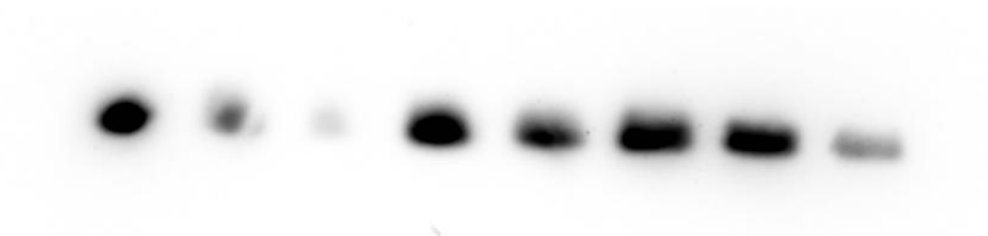

*Tsc2*<sup>-/-</sup> MEFs: 1% O<sub>2</sub>

rpS6-P

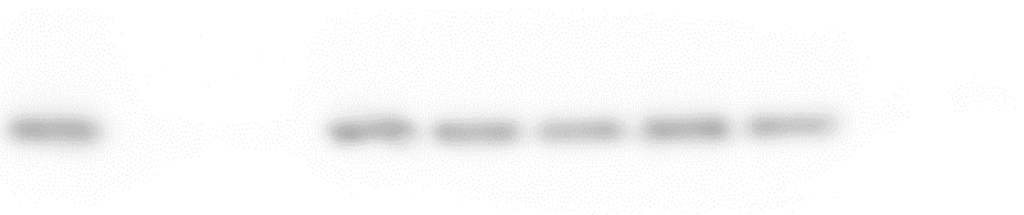

rpS6

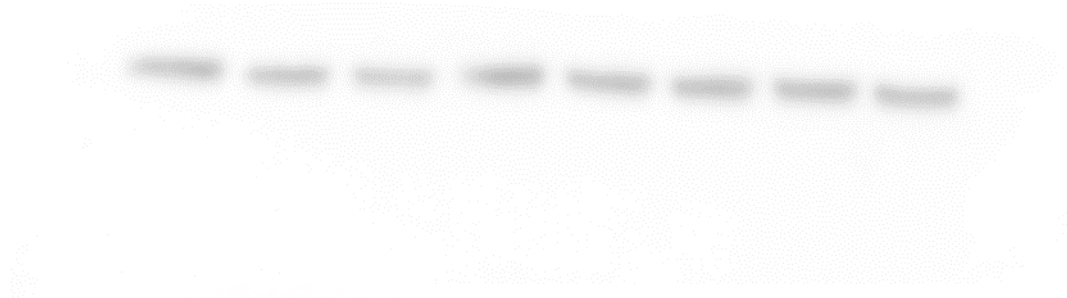

β-actin

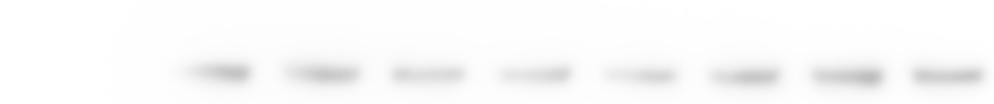

Supplementary Figure 1

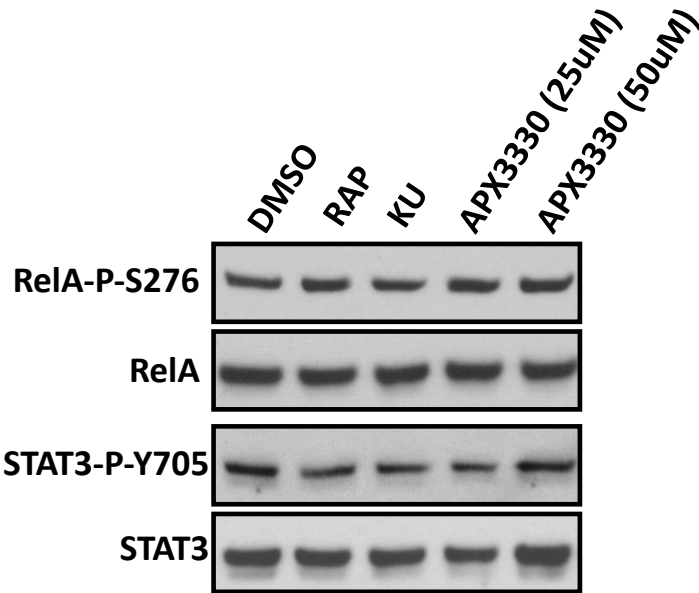

RelA-P-S276

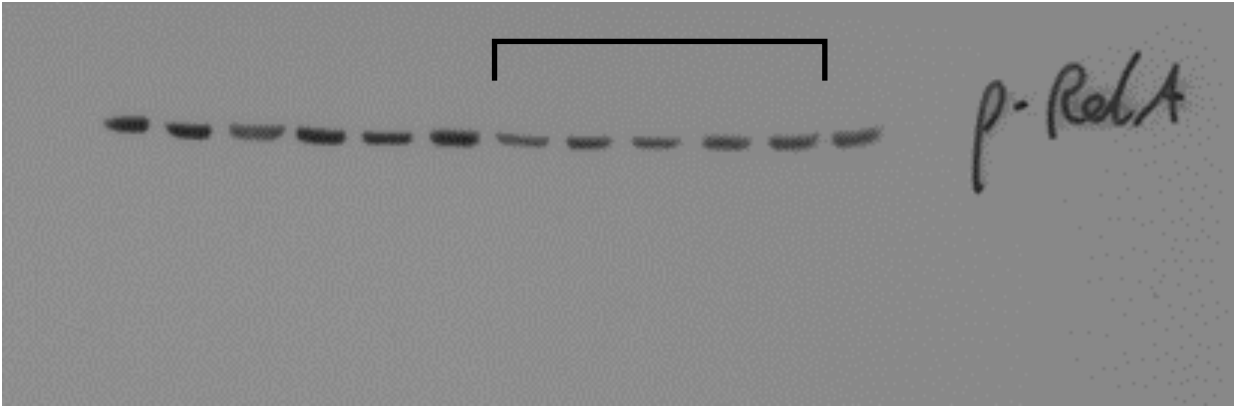

RelA

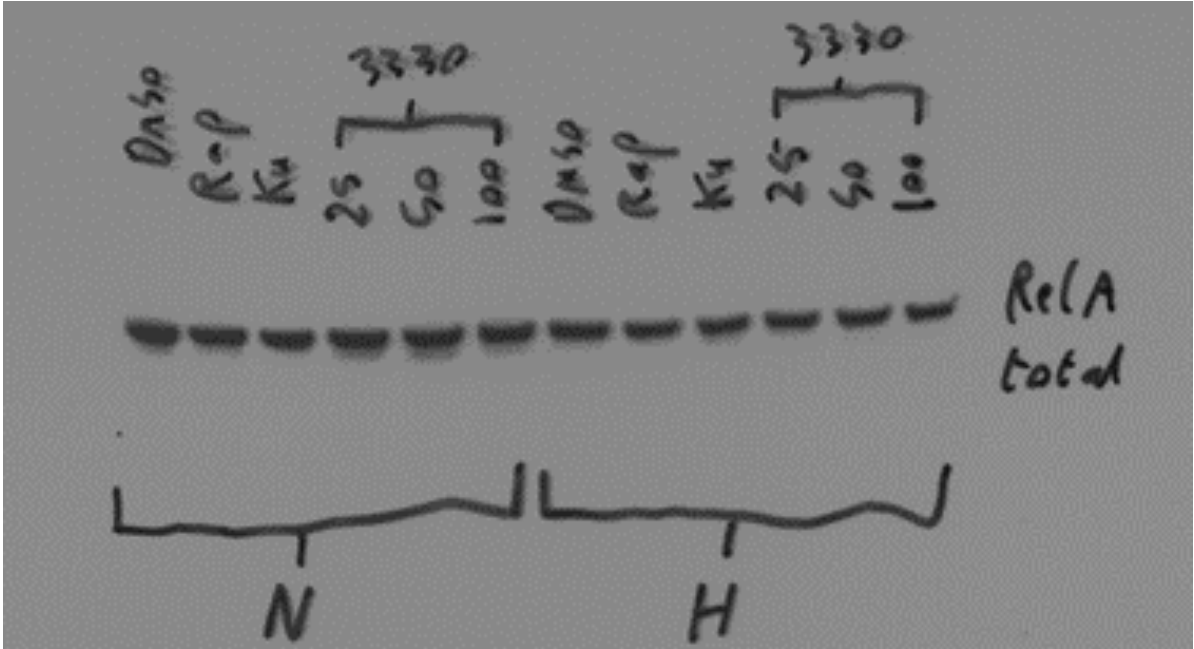

STAT3-P-Y705

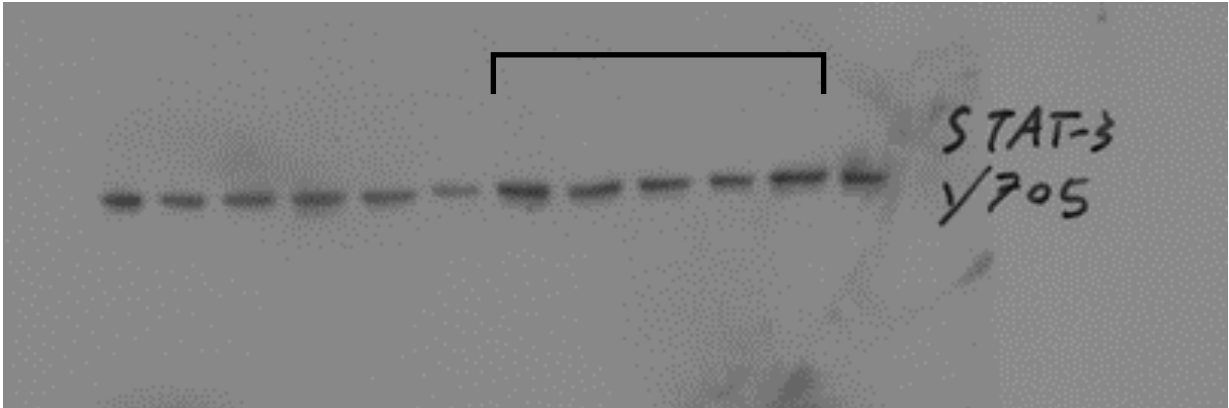

STAT3

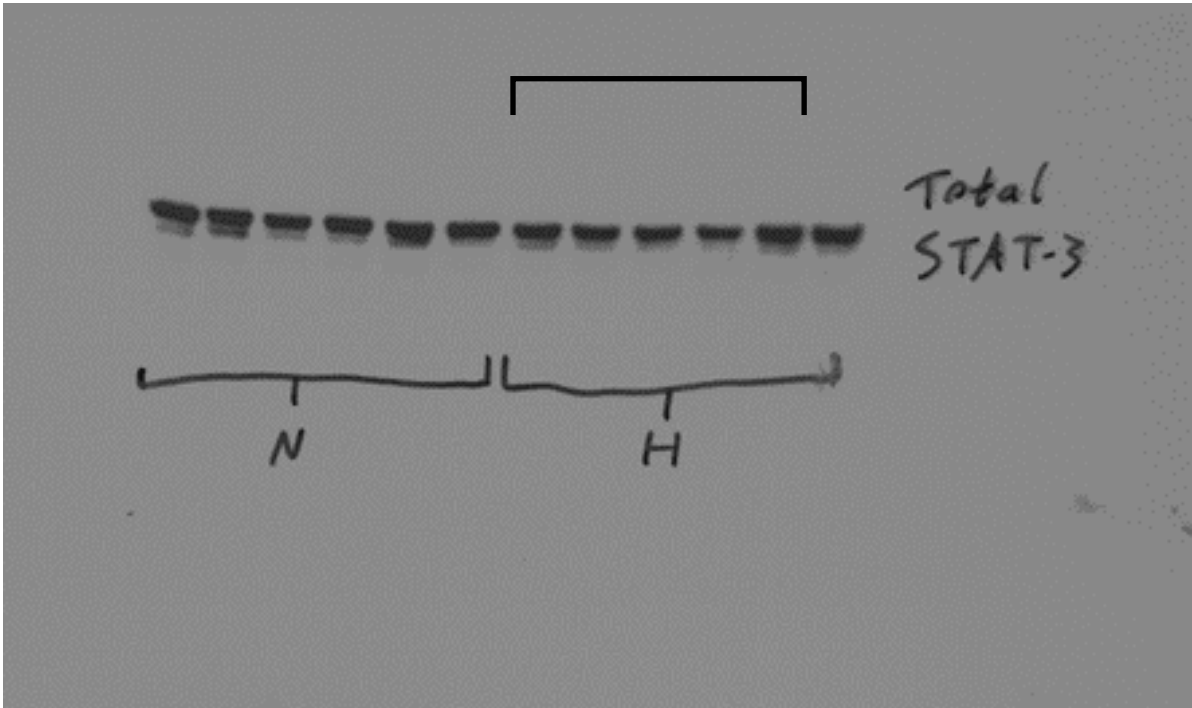

Supplement: s1 [file s1]
