# Supplementary material for: Drug Inhibition of Redox Factor-1 Restores Hypoxia-Driven Changes in Tuberous Sclerosis Complex 2 Deficient Cells
Source: MDPI journal article supplement (doi:10.3390/cancers14246195), 2022-12-15
Supplement: s1 [file s1]

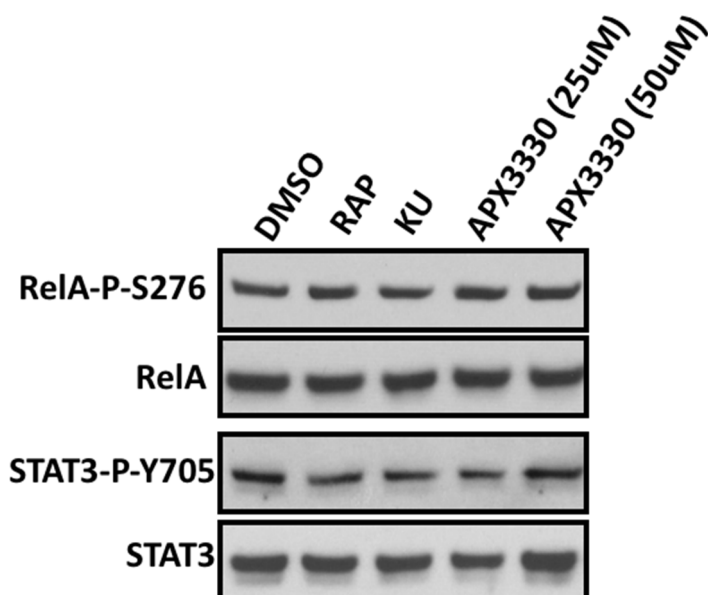

Supplementary Figure S1. APX3330 and mTOR inhibitors do not reduce RelA S276 or STAT3 Y705 phosphorylation in *Tsc2*<sup>−/−</sup> MEFs. *Tsc2*<sup>−/−</sup> MEFs were treated with either DMSO, 50 nM rapamycin, 1  $\mu$ M Ku-0063794 (KU) or APX3330 (25 or 50  $\mu$ M) for 18 h under hypoxia (1 % O<sub>2</sub>). Western blots for total and phosphorylated RelA and STAT3 were carried out, *n*=3.
