# Supplementary material for: Drug Inhibition of Redox Factor-1 Restores Hypoxia-Driven Changes in Tuberous Sclerosis Complex 2 Deficient Cells
Source: MDPI journal article supplement (doi:10.3390/cancers14246195), 2022-12-15
Supplement: s1 [file s1]

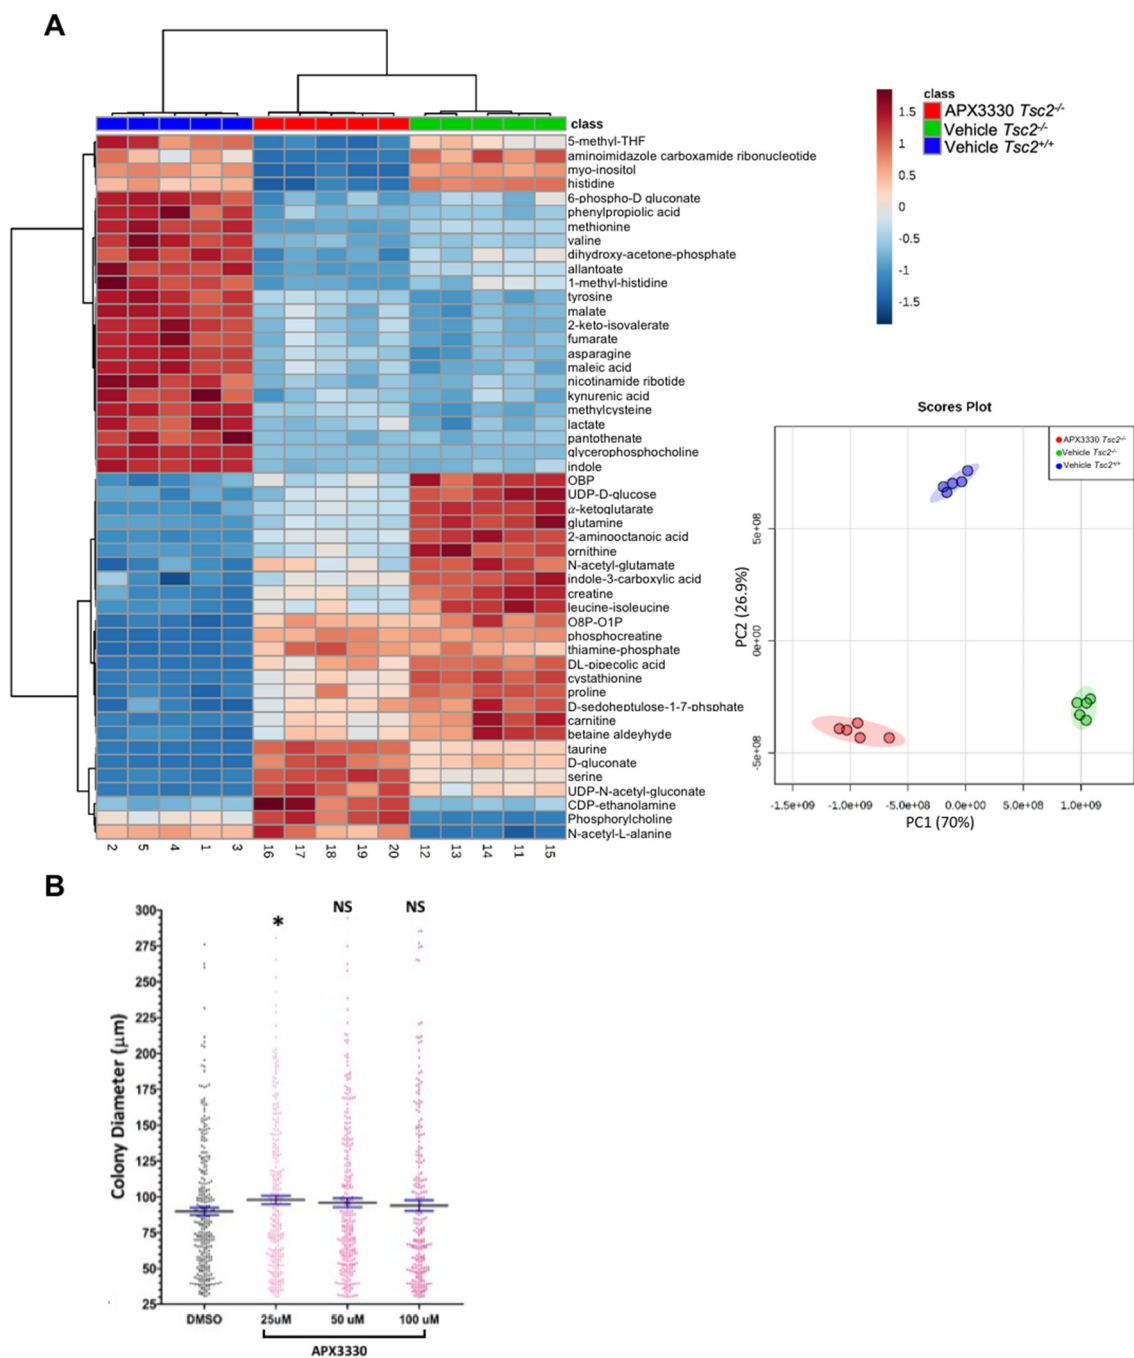

Supplementary Figure S2. (A) Heatmap of metabolite data on *Tsc2*<sup>+/+</sup> and *Tsc2*<sup>-/-</sup> MEFs treated with vehicle only (DMSO) or 25 μM APX3330 (over-night treatment, 18 h). (B) Tumor formation assay of 621-102 AML cells in 15 % (v/v) FBS with either DMSO or APX3330 (25, 50 and 100 μM) and scored as colony diameter (μm). \* *p* < 0.05 and not-significant (NS).
