# Supplementary material for: Drug Inhibition of Redox Factor-1 Restores Hypoxia-Driven Changes in Tuberous Sclerosis Complex 2 Deficient Cells
Source: Cancers (Basel). 2022 Dec 15;14(24):6195. doi: 10.3390/cancers14246195 (PMC9776744; doi:10.3390/cancers14246195)
Supplement: Supplementary file 1 [file cancers-14-06195-s001.zip]

Archive with 5 entries (5 files):
- cancers-1933841.pdf
- Supplementary Figure S1.pdf
- Supplementary Figure S2.pdf
- Supplementary Figure S3.pdf
- Supplementary Table S1-Supplementary Metabolimics-ChampionTee2022.xlsx
