# Supplementary material for: Drug Inhibition of Redox Factor-1 Restores Hypoxia-Driven Changes in Tuberous Sclerosis Complex 2 Deficient Cells
Source: Cancers (Basel). 2022 Dec 15;14(24):6195. doi: 10.3390/cancers14246195 (PMC9776744; doi:10.3390/cancers14246195)
Supplement: Supplementary file 1 [file cancers-14-06195-s001.zip › Supplementary Table S1-Supplementary Metabolimics-ChampionTee2022.xlsx]

## Sheet: Metabolomics Tsc2 MEFs
	1	2	3	4	5	11	12	13	14	15	16	17	18	19	20	notes:	normalised data
Label	WT Vehicle	WT Vehicle	WT Vehicle	WT Vehicle	WT Vehicle	KO Vehicle	KO Vehicle	KO Vehicle	KO Vehicle	KO Vehicle	KO APX330	KO APX330	KO APX330	KO APX330	KO APX330		WT (Tsc+/+ MEFs)
Urea	384879	295998	328124	249385	383964	245477	228702	189547	320844	292327	184189	149763	366707	324909	230391		KO (Tsc2-/- MEFs
glycine	7887.32	9101.35	7889.19	9705.53	10325	19733.9	23134.5	18371.7	22436.7	27215.5	18548.4	13715.8	14536.8	20167.3	24195.8		Vehicle: DMSO only
alanine	29558800	30010419	29754770	30215356	30439223	27673031	26706004	26947226	27715228	27975479	25100760	25483141	27145908	24545477	24910070		APX3330 (25 μM)
betaine aldehyde	295701	324726	267367	384438	399442	1.17137e+06	957595	950310	1.25651e+06	1.1496e+06	678755	870128	859294	717919	821833
choline	296006300	345456500	329201100	256663400	345088500	501720100	468455900	427833600	110758600	1092.15	166810300	297342200	1092.15	170618100	163485300
4-aminobutyrate	302417	255567	294558	293259	262678	254594	206950	234336	233479	226711	309014	252682	335838	256662	249438
serine	11010210	11300022	11623365	11719661	12227087	21054061	21477492	20811805	20911527	21343387	28799259	29426312	29527105	30877297	29490431
cytosine	8454858	4638515	5220540	4445026	4449121	4859481	7620009	7036998	3730220	4682422	8833767	8108423	8284892	4739893	4114017
Creatinine	2322065	2476179	2323765	2457282	2305457	2968159	2706288	2916968	2865331	2940655	2709089	2630434	2711942	2540196	2507288
proline	254981558	274535433	284801133	282448124	297621670	578322267	560813813	545919357	578229126	569302024	426009280	440219033	544225188	449849363	456475483
indole	12196421	12502805	12021171	11675603	11908636	5784415	5493499	5627998	6224992	6720018	5848541	5576679	5806318	6003702	5765136
betaine	58981398	65316889	59320994	59549599	62026293	50715261	45276284	44362143	56392757	54487841	69716777	79435122	67784966	69072074	69063118
valine	4880995	5023043	5064799	5212269	5493521	3103106	3110376	3095946	3232527	3210475	2963276	3005112	3094881	2858935	2799967
threonine	123053631	131492877	137267576	129303476	128261643	140473501	135810562	130519121	141493147	135494042	118670134	121162442	120952974	119460025	114521213
homoserine	95666.9	93149.8	97172.9	93022.4	71682.3	101911	101466	77742.9	88404.3	102445	109649	93184.5	90634.7	80902	76984.3
purine	3051459	3650200	2866623	3792499	3035592	1968513	1651996	1481631	2503450	2202582	1912605	2526490	1943102	1680037	1995131
cysteine	89706.7	69672.8	97856.9	51377.1	68624.4	109654	138698	149191	140313	115044	143546	107569	79946.6	143033	103942
creatine	117803826	124339962	116057675	119276337	118973369	162069792	152233899	154784950	159009641	160554462	137763345	139632462	140013478	130812346	133144027
nicotinamide	75182784	49446871	65005855	55093186	52598905	57900611	54594459	57682411	53273340	54814895	52834781	46922485	56376138	51164926	51431298
Imidazoleacetic acid	555055	922905	436600	950128	895161	897306	1.07842e+06	997959	1.02404e+06	876630	1.24944e+06	1118798	1.1796e+06	1.17952e+06	1.17989e+06
thymine	27200.5	134796	26469.9	30057.8	24514.8	159912	149520	211831	199108	151871	201509	189970	197771	170847	175298
DL-Pipecolic acid	968420410	967008645	959308356	967864307	976907719	1413799788	1448134015	1443381199	1454923171	1469314125	1300497103	1253167177	1369210835	1398085053	1285177638
N-Acetylputrescine	19637	35363.1	36836.7	45155.7	64093.2	63337	15942.6	57962.4	60057.5	74866.5	104315	29101.8	70321.4	108718	98874.2
hydroxyproline	383503	404187	391991	372175	384914	814689	515487	547495	601237	602700	505095	523823	543005	559050	548683
leucine-isoleucine	3741674	3856719	3657090	3900709	3836187	5844936	5095199	5606520	5598761	5627753	4591417	4440670	4836681	4465549	4421342
ornithine	1783673	1764303	1991146	1977540	2036779	6956396	8043733	8503978	6819872	7285725	3102869	3561596	4378236	3516586	3320775
asparagine	11020796	11389948	11020780	11547424	11427452	6628766	5638537	5848173	6657481	6470966	6645099	7486250	7156430	7131075	6778508
aspartate	13789045	14909509	14241213	15095673	15256913	11289062	11663688	11600403	12259738	10878675	11375932	12681787	13841085	12090051	11565216
adenine	140531678	128380591	141879096	103792511	124525536	97947405	111266439	95972869	86704300	95274573	93995170	78690178	100766475	100549134	97035212
Methylcysteine	38930305	39202658	38925963	37134364	39371130	22848409	22505317	21871781	23726579	23951535	25375087	25116670	26233751	26499893	25782548
homocysteine	205518	203146	188148	205195	200700	162405	150276	145214	129246	111805	118376	157287	132567	149770	141608
methylnicotinamide	133453	66897.6	87248.8	77837.4	79099.7	67153.7	192088	336087	344373	498058	552153	716752	202988	835406	804796
histidinol	37574.1	53275.2	39086.8	50906.7	39494.2	3469.92	4393.47	22452.7	2643.82	4658.72	13712.2	11225.3	6359.09	16747.5	4694.31
lysine	9460043	9226144	8281843	9284008	9285768	13495514	11992105	11132309	14520845	13919825	11028371	11782605	11673634	11666628	11244594
glutamine	377075757	390681287	375287316	385636300	394385940	789885955	772871627	812833918	770727617	870614406	453617009	522312601	494846057	497243542	477282989
O-acetyl-L-serine	1092.15	3811.99	1092.15	1092.15	1092.15	8343.17	1092.15	10036.4	11371.4	1092.15	9469.01	9477.02	8952.28	1092.15	7252.79
glutamate	428754852	445444713	443861668	444248189	457371194	514040694	542670860	539712726	549740059	526020262	407790851	447036460	461508406	409990519	420013712
methionine	11900233	12411450	12389077	11892315	12934810	7598767	7506643	7835784	7661276	7585708	6321415	6339415	6547120	6266793	6410870
guanine	491528	473361	504834	347701	356097	540269	491737	598153	417962	514500	570132	508687	558262	516439	548290
histidine	101390273	101629443	102482865	98501627	107623921	112133454	111921514	109156490	110876894	112584364	56585465	57168812	65076315	62118800	61161002
2-Aminooctanoic acid	103300	88541.4	91382.6	74282.8	100489	728982	709915	750796	833394	714154	325174	363728	367674	311994	342444
carnitine	6913619	6993393	6239366	6778751	6147983	57494577	46039920	48018732	66160384	63253682	30165484	39188402	37556187	32268679	34262435
Methionine sulfoxide	520225	584802	1.18274e+06	1.40068e+06	768030	475086	449417	422234	479974	488177	1.31287e+06	1.72062e+06	1.38532e+06	1.58473e+06	1.56387e+06
phenylalanine	90514157	113126468	77445846	109756650	86518751	59612629	51369599	43256731	73313332	62371543	54285961	75575044	55905211	54410524	53659065
Pyridoxamine	25192.1	22203.9	24264.6	25327	27612.8	25482.7	28509.3	35415.3	18532.6	24067.2	24957.8	18296.1	40454.7	36466.9	16974.6
pyridoxine	96084875	97641396	104960833	91531011	114899929	93169856	100317752	107881164	104351121	98624363	77774206	68402333	81149932	75663425	76543825
1-Methyl-Histidine	2.17594e+06	2.56179e+06	2.05476e+06	2125730	2.29848e+06	1.39021e+06	1.09612e+06	985903	1.43146e+06	1.30558e+06	851588	966517	956014	886628	877728
N-acetyl-L-ornithine	5297.54	10794.3	3467.84	3111.89	1092.15	1092.15	1092.15	2709.83	1092.15	1092.15	1092.15	17227.5	1092.15	4163.69	4984.08
arginine	126131027	133948959	106476047	134790614	123221110	160358427	136624461	121890882	178673201	165801641	145261325	148263324	150726291	147318928	154605947
citrulline	490322	469852	425596	415923	485452	369843	332378	384509	338340	358159	201010	584199	232098	208868	199302
N-carbamoyl-L-aspartate	2662760	2765733	2978078	3067821	2899498	2648716	2768607	2707103	2908970	2905109	3229379	3317825	3320324	3193270	3373729
glucosamine	2893440	2721600	2593755	2525085	2392563	6513692	6287728	5797970	4869087	4604843	4924878	5014049	4509140	3600410	3413166
tyrosine	21322262	23219818	22517357	22670940	23757690	13236850	12976516	12935117	14172240	13911828	15402490	15845276	15387377	14760835	14781428
Phosphorylcholine	3204346034	3143468139	3017088258	3142193286	3001937267	2104741914	2215099159	2137948380	2160165477	2130950734	4034979164	4215446035	3761964920	4027722131	4131743481
3-phospho-serine	1.09963e+06	940594	863784	924134	901249	1.27258e+06	1.25778e+06	1.13203e+06	1.34231e+06	1.21607e+06	1.07682e+06	1.36188e+06	1495732	1273210	1.18915e+06
N6-Acetyl-L-lysine	41980205	52316281	31528783	57591534	40110413	38061133	27635052	23218692	59656360	39349523	38980301	63093565	39731289	38020512	42840948
Acetyllysine	38046274	47712284	28788143	52559051	36917549	33646005	25129798	21554239	54657357	36485344	35403702	57183724	36437896	34513553	38596813
N-acetyl-glutamine	89971.7	35604.9	51449.8	47965.3	26424.1	33955.5	49700.6	51624.8	51132.7	34503.2	29710.6	33947.3	18023.1	23580.9	28312.1
N-acetyl-glutamate	110638	88861.7	98496.2	126276	102228	240523	232637	230620	255840	219288	195011	188668	160026	173787	142294
Ng,NG-dimethyl-L-arginine	38600714	40717055	34435749	37816583	40498542	36010640	32076958	29754523	30156292	36193569	19879696	13250657	25335978	22247199	21372681
Acetylcarnitine DL	124352442	143571326	142091381	142976448	146490850	276925339	247059899	244564157	281878928	313900558	193228907	228373575	259576231	225603145	204793558
tryptophan	22143146	25414447	20062177	23013439	20192063	13388248	11520044	10990299	14443850	13851840	13374402	17655934	13573345	11867869	13854936
Kynurenine	35497.3	23702.1	52399.1	25293.2	23554	20153.1	19762.1	33674.7	15246.8	31057.9	18449.9	1092.15	21630	51039.5	25472.9
N-acetyl-glucosamine	49095.9	26738	45694.8	27993.2	32029.9	68714	76046.1	57100.6	49877.4	60292.7	107992	102755	76289.1	127954	108972
Flavone	136998	120455	121628	125388	109683	88410	80923.3	82831.5	72975.9	92143.2	124227	110917	109520	131354	168493
cystathionine	44316.7	47370.1	49169.4	48492.7	58322.1	508019	533909	512043	558240	548382	285610	324441	359819	310387	323098
5-methoxytryptophan	34841	35343.9	30647.9	27300.4	30040.4	109640	21483.5	16852.6	26146	84479	42983	68191.6	29188.8	42264.8	32301.4
Cystine	11527.8	7562.45	4158.76	7903.21	1092.15	5276.88	12927.1	10081.5	7138.92	7626.36	10605.4	7601.74	30047	17539.3	13028.6
cytidine	197681	183113	264114	158461	187629	148621	149750	175225	196498	177942	262048	269295	228973	210545	221865
biotin	3844668	4513390	4054476	3863697	4391582	6545936	6760008	6606163	5055213	4416294	3840666	5981381	6017286	3397981	4247235
deoxyadenosine	76946	22946.6	45126.2	75745.3	84406.5	13249.2	55705.6	54461.1	83658.8	75670	57814.1	77634.1	82084.3	74751.9	80357.8
Glycerophosphocholine	935421618	938576038	931958511	924008554	992418974	46514338	44469211	44995328	48219916	50999110	75244708	69396372	61101286	64125872	66437645
acadesine	43924.4	33742	34360.6	25603.8	40744.2	39652.3	47899.9	38949	49292.1	51428.2	26979.7	38937.7	35257.9	40080.5	34041
D-glucosamine-6-phosphate	68878.9	60660.7	74273.5	61537.6	39581.8	53758.6	49868.4	3448.41	73965.9	63937.7	46118.6	68459.7	55914.4	42518.4	72600
D-glucosamine-1-phosphate	8185.47	11883.4	4191.69	120641	5436.37	166205	1092.15	4025.69	1092.15	4789.87	1092.15	1092.15	1092.15	1092.15	4873.96
thiamine	63404.8	38364.2	58915.2	44344.6	38957.5	38667.2	13408.8	22482.8	52011.9	45707.8	51645.5	43880.5	43604.2	86018	36093.9
S-ribosyl-L-homocysteine-posi	59039.4	36589.7	43654.3	45207.4	15465	39622.1	51031.7	34431.7	28893.3	26433	60953.6	30407.7	40275.4	52465.8	72985.6
deoxyguanosine	66229.1	41793.3	46811.1	57911.2	44267	41700.3	46342.1	49956	42391.1	49544.2	50728.5	43089.5	60182.3	34728.9	50043.6
adenosine	60047.6	53564.5	63063.3	125429	5013.62	111667	67825.3	78342.4	67570.9	122023	146458	137665	192047	181744	138694
1-Methyladenosine	19672.4	4013.74	33075.8	47509.8	46540.3	20963.4	34969.2	28562.6	34618.7	30141.8	326151	128051	327904	385947	416117
guanosine	25065	18014.4	22162.7	21629.7	21802.1	23146.5	3331.69	19743.1	31873.5	3375.26	46770.8	20418.9	36094	37907.9	40274.6
L-arginino-succinate	18869148	23225630	21822820	25069991	24710005	21877839	20304149	19436547	19968983	21008251	25001381	24881201	24887637	25505293	26311514
7-methylguanosine	27047.4	19528.5	26706.9	28493.7	19342.4	6929.4	1092.15	1092.15	12641.8	12776.3	26280.1	29564.4	34761.5	30636.4	41676.4
dCMP	91719.6	66579.5	65143.1	64784.8	59650.2	73851.7	53021.8	79313.5	59330.6	60351.4	69713.5	132144	60484.1	98281.9	106138
glutathione	216438240	281189305	38489188	21629762	231233536	320927684	282073525	321372971	262484167	342549244	45746421	22639989	17464038	16053143	13253658
dTMP	1413135	1251724	1282644	1187586	1224729	1677414	1776480	1495223	1474885	1680919	1725100	1532047	1778298	1846639	1732615
CMP	3445053	3586614	2701907	2722279	3399464	3151642	3362412	3470448	3392550	3645881	4032833	4559809	3103795	3855994	3605753
UMP	3413072	3072373	3312667	2191142	3019472	4755452	5653721	4973463	4692541	5685973	6163890	5231213	5548514	6098171	5780984
dAMP	2102729	2330705	1954161	2647985	2368880	1305835	1323760	1384923	1733904	1420463	1723936	2188623	1666964	1589443	1692104
Nicotinamide ribotide	518791	565537	457926	496889	554856	259971	238023	240683	285850	253513	244939	274637	254611	228283	266989
aminoimidazole carboxamide ribonucleotide	258248	276674	217815	205915	241404	260726	278419	248017	295577	288414	122632	125765	127470	127562	129788
thiamine-phosphate	104482	97576.7	127371	115845	106302	470095	491768	566884	499627	446173	452454	587056	614953	537912	517298
dGMP	58297.1	64408.8	56090.9	52327.6	73560.2	50464.5	52588.5	51620.1	48975.8	45387.2	48910.2	41441.7	37772	59493.7	61178
AMP	90640543	82901164	88732531	76394684	79051282	73051648	76761768	64691842	67935145	71244327	85037478	75110525	87088558	87900453	82666306
IMP	6402449	5902151	6285763	5787061	5717193	5113465	5789490	4763521	5125471	5334021	6299658	5229980	6429759	6441867	6224097
S-adenosyl-L-methioninamine	107007	82329.2	88967.9	1092.15	62732.8	120446	96300.2	91416.1	52600.5	416253	1092.15	330978	1092.15	70431.7	1092.15
GMP	684167	587303	1.29606e+06	601210	591329	711934	669414	966840	970428	634910	698546	626737	677583	700015	656477
xanthosine-5-phosphate	100132	102316	53942.4	52851	90439.3	23103.1	32549.3	34628.7	47520.4	30145.1	8762.01	11290.9	20909.9	9060.64	15187.4
riboflavin	44270.3	75900.8	73292.1	50774	54255.4	76784.7	55725.2	44182.9	59008.6	57600.2	76542.6	46879.7	76570.5	70105.1	57880.5
S-adenosyl-L-homoCysteine-posi	14201171	14158439	15485228	16455943	14899513	20354372	18070983	18024632	18847838	20451146	15893165	15497428	18381194	17878492	19689482
S-adenosyl-L-methionine	192582060	260912099	308272840	224588426	300113507	203209951	234472887	219985618	140283513	194176795	99770304	90828623	113740153	114917264	98884858
folate	123802	60062.9	63111.5	49755.6	55817.5	74153.4	60501.7	85790.3	85757	95312.7	96807.6	99233.1	116998	130707	95200.5
7,8-dihydrofolate	26699.1	34589.1	22422.1	17573.8	41871.8	18991.2	14969.4	18368.2	18447.4	25887.9	1092.15	17725.9	13714.9	26617.9	10461.8
5-methyl-THF	119579	140667	121992	111529	136428	85844	97116.4	103464	92659.2	85664.1	38741.8	44614.8	35505.7	32913.8	43769.6
glutathione disulfide-posi	129858119	116836155	213940712	215244869	155435257	148399046	170681149	164001343	206597018	174059978	247151403	294530374	270004248	279223154	283392688
NAD_posi	44985946	40197532	36064379	44295011	39762122	20630329	24641295	22718512	29064935	27554193	25732620	31697495	24513878	25720154	27524817
NADH	2.60508e+06	2.04243e+06	1.83307e+06	1.82512e+06	1.62809e+06	616270	801901	687837	1.2049e+06	832634	291359	350376	298702	373018	348775
dephospho-CoA-posi	18808.6	21237.1	9116.81	9707.7	15603.6	18671.2	14971.1	27220.4	23130.9	19711	8061.99	7257.01	10532.3	1092.15	4836.65
NADP_posi	839620	724911	579659	582064	594524	543694	586428	592578	648754	680713	531526	449643	450385	635677	532781
NADPH	78917.7	50386.7	61438.2	44061.6	67054	36545.7	66194.2	83875.9	52686.9	74463.6	20408.3	41086.9	16677	30463.1	27302.8
coenzyme A-posi	592175	781718	138055	70721.3	614264	891268	734609	843109	496975	787578	185228	149565	97726.8	116547	129661
FAD	75860.4	123828	159668	88625	118366	155903	108226	121163	110958	112309	141213	170267	121825	238940	190497
malonyl-CoA-posi	1092.15	1092.15	1092.15	3036.48	3032.57	1092.15	4082.72	1092.15	1092.15	5442.25	4837.25	6417.3	1092.15	16135.6	5623.98
succinyl-CoA-posi	49152.1	42940.7	36421.6	16379.8	42463.2	15655.8	4762.43	7498.57	5442.37	6805.92	4839.69	10482.7	7257.09	16119.4	11306.9
sarcosine	28504403	29762510	28730009	29075783	29454439	26872630	25090806	26378600	26270838	27215850	24808999	25592784	26216312	23697501	24441018
putrescine	511288	776255	758399	450084	170108	1.13547e+06	399547	285076	521237	578297	879220	1.1794e+06	1.35747e+06	926953	1.15373e+06
spermidine	2665134	2991769	2231270	1699463	3620957	4740823	6877989	8723525	8962479	4752987	24383592	10526791	31811195	39885002	43159759
spermine	18371967	21545560	30156586	33680141	27694739	22016387	30636756	32549592	20819778	29276650	31200378	18227713	26554646	32760938	27496498
N-acetyl spermine	684784	695608	920076	1.18857e+06	571166	98229.6	118181	335048	56373.8	73504.6	350039	224593	31734.8	446433	334560
N-acetyl spermidine	248525	497987	681367	350586	178998	806257	164137	76679.9	19240.5	150717	119461	90429.4	181764	197534	209109
Nicotinamide Riboside	40070	40844.2	56484.8	47697.1	51453.1	56707.6	35459.3	30440	46130.1	55266.3	43441.1	44374.9	6098.84	77229.8	56160.3
Adenylosuccinate	9101.28	12136.5	7887.18	1092.15	15170	14971.3	8845.23	23814.7	27894.8	17720.9	35497.1	37917.2	39532	12099.1	39532.3
cholesterol	21349257	19477900	44386800	4250880	165625248	2467341	86376269	35506640	20198403	18952218	27918578	19684316	4406150	8675707	13208001
arginosuccinic acid	14985063	18424414	19035832	20436024	20704434	17196912	16525078	15741362	15923962	15477844	20028081	19184157	19902134	21023557	21285532
phosphocreatine	326628	278711	453802	406113	313088	7144264	7.25274e+06	6.86335e+06	7.20486e+06	7.33546e+06	6.62716e+06	6.50141e+06	7.62162e+06	7.44189e+06	6.66622e+06
retinoic acid	27264	34512.1	31694.1	33236.1	31611.6	24551.6	22353.9	17494.8	26326.2	34140.4	20553.6	58032.4	5156.81	47199	9712.07
N-acetyl-L-alanine	128996647	137686472	127416096	130614979	133620395	179903260	164827115	173434874	174350229	180732670	147721887	161691294	152497786	148079245	146177485
HMG-CoA_pos	38835.1	36407.5	43083.4	41263.6	24297.1	23135.1	21093.3	16331	14300.7	14969.3	44402	46789.5	94388.6	47593.9	76637.7
cysteine sulfinate	4850.97	1092.15	1092.15	1092.15	1092.15	4063.27	13608.3	4762.57	8843.27	1092.15	8065.97	4839.67	10487.7	1092.15	8873.63
N-acetyl-aspartylglutamic acid	111668	154189	61897.5	61898.8	159351	138842	142999	127971	100912	122463	75019.4	99231.9	83074.8	134738	78321.2
N-acetyl-L-aspartic acid	79532	69049	72725.7	84063.2	4494.08	95623.6	80597.4	78591.2	65193.6	104296	87380	80078.5	90174.6	127192	96161.9
glyoxylate	10437.7	3016.5	4714.8	6812.1	6128.47	3400.93	6801.09	4783.8	4059.25	6119.52	4855.55	7282.41	1092.15	4009.76	6456.01
lactate	601916	582946	573713	516075	527493	253955	247868	205587	286464	285714	274464	266340	279268	298648	360080
2-oxobutanoate	22447.3	14563.4	24246	16091.3	15674.7	16372.5	28580.8	14273.5	19054.4	19714.9	14226	21535.8	20965.6	16130.6	19278.2
acetoacetate	16367.5	16446	17431.9	15515.1	23497.5	17692.4	10826.4	16273.3	14969.4	15651.4	15908.4	19347.7	20952.1	13710.8	15913.8
glycerate	38864.7	33362.8	35798.5	29148.4	46754.2	38108.2	51721.4	34702.8	51725.7	53079.7	71800.8	83895.2	70186.7	80675.1	85525.8
uracil	6674	1092.15	5434.98	1092.15	3616.73	1092.15	1092.15	4817.73	4505.7	7377.16	14467.9	11362.3	13818.2	16829	15825.7
fumarate	1.08465e+06	1.16538e+06	1.09837e+06	1.26767e+06	1.18542e+06	554065	525997	484961	591390	590080	556674	716951	641478	556139	645489
Maleic acid	1.06453e+06	1.12941e+06	1.06819e+06	1.15957e+06	1.12012e+06	600733	479460	537867	552084	520444	558641	704544	648826	560779	646952
2-keto-isovalerate	1.04438e+06	1.06778e+06	1.01201e+06	1.15168e+06	1.05932e+06	509867	475138	470007	571799	513620	526011	662472	552545	519908	630627
Guanidoacetic acid	135254	151537	121403	163811	135336	66807.9	59890.8	52415.1	75543	66684.3	63278.7	86328.1	80294.1	80587.9	79104.2
succinate	147348	163056	177966	213268	196320	119765	130350	120363	122252	116236	216855	246974	191006	184160	229196
Methylmalonic acid	183205	195252	184600	196479	200113	138464	138297	137175	148606	164032	203096	250202	203605	194376	249265
nicotinate	7069.44	1092.15	4526.25	9073.28	15862.2	9034.7	17248	9133	4686.26	14962.3	21731.8	21950.6	16752	9736.9	10325.3
taurine	5906197	6308664	5693445	6028627	6243616	21548960	20048535	21013687	21466952	21371453	28068190	30377601	28475831	28663830	27728861
Pyroglutamic acid	413856	384578	364442	425398	373830	364490	364671	315363	518358	423329	323454	400771	312188	342971	327533
Citraconic acid	366723	462971	399422	373937	331990	367899	397421	320964	360417	338422	257365	311153	300201	299484	239804
2-ketohaxanoic acid	38833.3	29726.3	31537.3	35118.1	34581.4	40826.9	25858.2	34705	46985.5	40297.3	41133.4	47595.7	44368.3	40333.7	38738.9
N-Acetyl-L-alanine1	964836	972156	965879	1.01662e+06	996324	568942	611520	611856	626961	606774	1.16649e+06	1.07175e+06	982877	956123	1.03867e+06
oxaloacetate	83684.3	88204.5	91562.6	77841.7	97195.1	83108.5	72139.4	71910.2	92031.1	55821.8	43070.9	34967.5	69262.1	62772.3	60456.2
Hydroxyisocaproic acid	32650.2	38705.8	15134.3	40658.5	24272.6	7504.55	11568.4	7441.98	14075.2	11607.8	14513.2	23247.7	20974.8	15317.4	15320.3
malate	7230455	7929580	7441009	7673675	7864339	4010118	3733362	3455655	4169155	4088964	4245164	5034174	4441168	3841283	4656545
hypoxanthine	5376.27	13413.4	14594.9	3575.14	5365.26	6824.56	18685.1	5903.12	4976.61	6153.96	16965.2	1092.15	4267.53	1092.15	9076.17
p-hydroxybenzoate	62532.3	25128.7	26796.9	32907.3	8059.04	19860.5	23666.9	14611	24544.8	7767.42	28068.5	89434.2	12916.8	25402.2	34548.2
acetylphosphate	717977	727449	694126	669577	763275	697794	715037	646729	736021	748671	640933	608247	651301	469380	638498
Carbamoyl phosphate	15305.7	14750.3	10815.4	13494.6	6526.48	9606.76	14890.6	16452.2	23964.6	15462.4	1092.15	18590.9	7837.31	8292.67	12629
a-ketoglutarate	2871943	2925743	3121282	2967239	2935969	4727852	4739577	4820489	4740750	4952751	3429102	3516781	3663706	3533705	3524816
Phenylpropiolic acid	239145	273631	266607	298043	275092	120102	131740	134416	135672	137256	106430	143830	123307	126164	125579
2-oxo-4-methylthiobutanoate	14561.6	13956.9	10922.3	9097.52	22454	5412.88	1092.15	6801.05	1092.15	4081.73	1092.15	1092.15	1092.15	1092.15	5644.89
2-Hydroxy-2-methylbutanedioic acid	74754.1	68728.7	87875.2	88275.7	83095.2	79928.1	68936.1	83626	67051.6	71177.4	88219.1	101970	98122.5	95890.6	113598
3-methylphenylacetic acid	48926.1	37494.8	42415	59575.4	45450.9	40737.4	34695.9	36718	43537.4	28581.8	33753.9	37087	35367.4	56322.4	29824.6
xanthine	91450.3	42469.1	56672.9	75449.6	78033.2	24004.3	1092.15	1092.15	1092.15	10152.6	1092.15	22607.4	29407.2	8169.82	36825.8
2,3-dihydroxybenzoic acid	916375	1037737	1.23318e+06	1.15011e+06	1.26829e+06	674862	1.26202e+06	1.36365e+06	1228404	1.10261e+06	1.34613e+06	1.43775e+06	1.34578e+06	1.2935e+06	1327389
orotate	474033	461395	470544	412777	537708	670166	754302	740524	687299	611747	589684	637775	794605	777951	733499
dihydroorotate	200146	232459	226559	284784	230190	332232	258061	276801	281288	200406	269582	409371	401970	422766	395433
allantoin	18217	24873.2	19418.6	15774.4	10364.5	16362.8	25160.3	31917.3	17013	33996.1	17744.6	13711.1	20147.3	15269.9	13710.9
Aminoadipic acid	137244	138994	91689.2	108840	124347	202032	207693	222855	187018	191897	151538	162489	172069	129308	125891
Indole-3-carboxylic acid	89723.5	106254	81872.1	70290.1	88111.4	163463	157931	157484	157800	172502	108467	123065	118994	124850	124273
Phenyllactic acid	50954.7	64839.5	29733.7	84370.1	40664.4	27220.1	19723.9	17692.9	69421.8	37423.5	33883.2	89555.2	23390.8	25004.8	24198.1
quinolinate	173727	159685	195902	174047	212918	121055	202500	236153	128052	113872	105589	131886	117630	115828	121746
phosphoenolpyruvate	457061	358281	390871	325525	148593	472390	551253	476662	314101	451177	532248	95944	504468	436261	446194
Uric acid	37056.8	50591.4	34604.6	34610.3	47192.8	80582.9	78803.2	60703.2	83535.9	87077	85545.1	92543.2	87750.5	78680.5	82646.4
dihydroxy-acetone-phosphate	858396	769824	805134	786226	868167	492024	490901	431516	561425	562554	327143	393117	366077	395770	320198
D-glyceraldehdye-3-phosphate	574023	671472	686023	591201	712715	622769	696959	548679	656126	729130	406247	713926	628157	636430	527743
sn-glycerol-3-phosphate	653746	816816	658603	699747	776477	513401	496805	487599	540574	547338	805065	859113	735425	752283	789031
shikimate	32698.7	34588.9	37618.5	16990.9	15172	34033.2	15647.2	34514.8	32662.1	31300	20179.1	10482.9	30671.2	15328.2	16132.9
aconitate	58091.9	58529.6	65084	48506	60680.8	52805.2	56318.9	39032.8	62525.2	49606.1	34369	29811.1	33565.8	37502.2	32010.2
allantoate	761326	932996	865237	797388	762282	335695	304783	306488	310313	322301	117786	165434	128292	137998	140585
Ascorbic acid	30339.9	23015.3	32126.9	27303.5	32150.2	23808.4	27173.9	19050.3	21537.7	26537.7	18359.5	14514.8	18490.6	7256.87	11295.3
2-Isopropylmalic acid	51773.7	70999.9	47119.2	72590	50110.1	36058.4	30370.1	37301	47071	32906.7	29443.6	30573.1	23394.7	20123.9	32783.1
N-carbamoyl-L-aspartate-nega	12653.1	12576.2	16508.4	17206.1	14150.3	6018.57	6210.24	1092.15	4750.91	7494.78	1092.15	14452.7	16120.6	5049.54	1092.15
Pyrophosphate	14627360	13831505	15310147	14043779	15147554	17443600	18921617	19455381	15148675	17632219	23746177	19305854	23424748	23663820	22617087
glucono--lactone	36923.9	21845.1	27840.9	29271.3	32021.3	48986.8	47704.7	39450	50356.6	47820.7	40334	63725.3	61295.3	48390.2	62095.5
myo-inositol	51466806	55906805	55950426	55666770	57599781	53112333	54050020	55476337	55132825	55431084	13617375	14266931	18235694	14161582	14604848
homocysteic acid	1092.15	4878.12	8493.37	13213.7	1092.15	12931.1	12930	10897.9	14983.2	12242.9	24196.3	35465.4	27426.7	29033.3	20146.4
4-Pyridoxic acid	36151.3	44853.9	34282.1	45425.2	29931.3	22067	50223.7	27578	18995.1	18158.2	27289.3	38049.2	45476.7	53466.3	50767.7
3-phosphoglycerate	1.14715e+06	1.10212e+06	1073340	1.04975e+06	1.12391e+06	612598	730280	710992	779598	723668	871525	783666	757002	807457	907110
Indoleacrylic acid	623812	554666	479821	501208	467139	540524	514309	425886	545457	538542	600496	631515	567942	583831	595955
Kynurenic acid	156557	144673	116722	125104	122250	42161	31695.7	26876.3	55461.8	28242.5	21761.4	38288.4	56357.4	47109.6	41977.4
citrate-isocitrate	7485579	7641787	7466772	6802156	6712532	8171142	9677279	8779327	8144095	7412178	3748572	5116214	4348538	4100153	4497170
isocitrate	26638	32108.2	29188.5	33362.1	32173.8	32661.3	34690.9	38163.9	35959.5	35892.1	30641.5	23113	29851.8	20147.2	26388.7
citrate	1.82689e+06	2.20993e+06	1.82312e+06	1.67833e+06	1.72369e+06	1.94786e+06	2.42309e+06	2069419	2.04131e+06	1.97746e+06	930357	981201	1.07335e+06	958109	1.27109e+06
2-dehydro-D-gluconate	11525.8	11526.5	6658.77	7885.51	12135.5	19733.6	11566.5	18375.8	21775.6	11568.7	14521.3	12085.4	19359	18550.5	17746.9
D-gluconate	326059	364604	315598	335395	347679	1.43798e+06	1.36144e+06	1.41669e+06	1.54475e+06	1.42467e+06	1.7052e+06	1.93261e+06	1.98986e+06	1.76603e+06	1692910
D-erythrose-4-phosphate	701617	943282	671094	757623	657875	536377	501170	388443	598644	552354	535122	630729	446431	458135	489220
Xanthurenic acid	135620	150911	136874	168105	167034	126001	7986.52	138204	133551	87657	95017	162470	111335	159004	118154
lipoate	40037.4	1092.15	1092.15	1092.15	17559.2	50296.8	68056.2	48987.3	32723.5	2728.62	7259.59	1092.15	1092.15	4030.86	1092.15
D-glucarate	1092.15	4246.74	1092.15	3637.37	1092.15	1092.15	6138.39	4762.49	1092.15	5442.75	7259.49	9679.54	1092.15	5645.76	6453.82
deoxyribose-phosphate	85136.5	76727.8	104310	79193.3	91360.7	22487.8	1092.15	1092.15	1092.15	26936.1	1092.15	1092.15	10051	58261.5	49033.6
pantothenate	5.33779e+07	5.21414e+07	6.78251e+07	4.77086e+07	6.0946e+07	5.23459e+06	6.12529e+06	3150.02	5.47431e+06	6.35955e+06	5.08406e+06	4.33458e+06	4.66521e+06	5107.09	4.93473e+06
deoxyuridine	11528.2	6702.38	5976.92	6605.81	1092.15	4760.62	4065.42	6804.81	6790.31	8161.1	1092.15	8875.42	1092.15	1092.15	4773.95
ribose-phosphate	348641	407091	390055	351213	447559	622359	555617	590501	593919	602784	360287	326655	301887	393055	280915
thymidine	7923.83	15097.8	14556.7	12742.2	10910.7	8162.57	16326.9	6120.07	8834.37	7487.05	9729.83	12121.2	13695.8	19232.7	7939.1
uridine	72106.4	69130.9	53326.5	52627.5	38086.8	75636	80030.8	84999	81976.4	95678.1	246386	154408	173616	218889	216719
deoxyinosine	56432.6	69666.1	55121.2	55217.2	6991.92	82342.7	64049.5	88453.4	76897.8	100840	122634	120212	164580	139574	9755.02
shikimate-3-phosphate	40013.9	42940.7	42189.4	54473.2	49881.3	66976.1	69655.5	65229.7	60463.1	72296.5	63020.2	24402.9	65182.9	52906.4	48499.2
D-glucono--lactone-6-phosphate	54031.9	9710.73	47560.2	52741.9	14376.2	12154.6	29195.2	34709.5	9462.71	10264.8	70437.9	27790.7	23579.8	29223.1	25290
hexose-phosphate	3952063	4691886	4082574	4482135	4282156	3530328	3654240	3650066	3572011	3519481	3482764	3948213	3603570	3661358	3688921
glucose-1-phosphate	2166740	2074657	1901540	1941759	1946505	1654619	1558680	1568536	2025398	1927597	1455404	1608776	1518412	1357077	1358530
glucose-6-phosphate	1368705	1618868	1349239	1479079	1590941	1117942	1062102	1023676	1173879	1093791	1175012	1354124	1142538	1160398	1190352
fructose-6-phosphate	1.12068e+06	1278670	1.18343e+06	1.23134e+06	1.24302e+06	928840	928899	920942	973119	914075	939100	1.13481e+06	1.02397e+06	1.0128e+06	977076
1,3-diphopshateglycerate	372462	155678	461566	394125	396753	385335	776805	715948	251246	358908	363280	552450	341758	305915	295479
2,3-Diphosphoglyceric acid	1.0213e+06	764236	1.09225e+06	706231	852221	1.69077e+06	2.00686e+06	1.69039e+06	1.11619e+06	1561611	1.49257e+06	861845	1.54061e+06	1.39048e+06	1.28352e+06
S-ribosyl-L-homocysteine-nega	4746.08	2390.08	11322.1	9675.27	14511.6	6788.09	5435.1	6931.65	14991	11751.4	3802.45	16931.2	13668.3	19469.1	17554.7
inosine	664190	517621	1.17575e+06	470002	709067	1.15915e+06	1.69064e+06	1.61591e+06	551959	1.4725e+06	1.61427e+06	453762	1.40709e+06	1531495	1.05007e+06
6-phospho-D-gluconate	171772	179579	161123	178281	181455	75259.3	77847.7	95337.4	93507.3	111707	57958.3	79786.1	68573.3	88456	67763.1
xanthosine	25878.2	30350.9	88368.5	34644.7	30059.2	21962.8	35816.3	86836.3	38880.7	94061.4	95667.4	17381.2	36848.1	43572.2	23734.1
D-sedoheptulose-1-7-phosphate	713023	716039	705505	750731	817170	1.10387e+06	1.08316e+06	1.05718e+06	1.19059e+06	1.1375e+06	928798	987288	990062	996206	1.05893e+06
N-acetyl-glucosamine-1-phosphate	310369	304773	278359	234951	292481	509703	380234	563809	285494	382025	795380	444691	578286	626160	676812
glutathione-nega	1.64568e+07	2.19668e+07	3.88277e+06	2.57045e+06	1.70635e+07	2.43363e+07	2.23965e+07	2.33058e+07	2.07946e+07	2.43308e+07	4.33554e+06	10234.5	2.50425e+06	2.19629e+06	6032.07
dUMP-nega	41267.1	60708.9	29722.9	27908.1	75304.8	29941.7	20421.7	16274.2	22455.3	14967.4	15346.1	15143.8	8065.45	19510.4	17731.8
Geranyl-PP	115423	108255	98665.1	87868.2	107681	77410.8	94593.1	75471.5	83640.8	87605.2	78024.2	61866.2	59841.3	65899.1	79523.8
O8P-O1P	315049	347563	337909	358813	381880	843089	764909	864618	988880	905100	745096	843203	792010	777458	754701
dTMP-nega	280147	257708	257876	295690	290600	185344	133360	141587	150465	141428	176097	191728	168805	137125	161691
cyclic-AMP	43871	43042.4	34693.1	1092.15	1092.15	50822.5	42631.1	1092.15	60551.3	1092.15	67477.4	86499.4	1092.15	92142.3	82980.2
fructose-1,6-bisphosphate	14572858	16709336	16384002	15897737	16416321	20295420	21331612	19022895	19359004	20673625	16576827	16802022	18564954	18543792	16491030
trehalose-sucrose	81770.9	80712.3	67906.6	59083.7	65765.8	82591.8	71403.3	87182.2	83125.7	82589	141326	61719.2	75722.5	74519.3	53921
Cellobiose	6652.65	4822.14	6049.79	7280.93	2425.03	3401.02	2721.28	3237.62	2722.7	4764.81	1092.15	4031.53	8063.53	3225.76	1092.15
orotidine-5-phosphate	14059.4	20050.3	16032	29459.7	70196.6	15179.6	13375.9	94016	14196.5	8996.39	12585.4	22321.7	5180.91	14118.3	10534.6
SBP	298640	363937	270198	332271	359965	562984	569691	485654	558500	546841	425584	367436	380328	515936	288548
trans, trans-farnesyl diphosphate	9228.11	7084.65	8854.26	13037.3	44862.1	19657.2	16124.8	9371.2	17642.3	20413.6	17329	22427.4	14379.4	19350.2	21856
S-adenosyl-L-homocysteine-nega	4641067	4583650	5370543	5862344	4683339	5904648	6583645	5955388	5610229	6482373	5540380	4891926	5853752	6321936	6596324
dCDP-nega	181698	160827	166822	128016	152945	204815	203531	157663	142920	214900	203229	163056	166135	188775	172640
5-phosphoribosyl-1-pyrophosphate	740502	567428	709432	448872	547844	526632	541998	519466	367301	472611	750204	421368	584836	666468	622352
OBP	134170	123658	144216	120786	108496	265172	280223	243222	262749	268061	184508	158589	169151	184400	164713
dTDP-nega	737413	685466	638313	595763	616494	622522	561308	528302	592534	581743	627804	617224	547603	626709	512322
CDP-nega	1854363	1517572	1453011	1198350	1243675	1543805	1524116	1382213	1064197	1216194	1878692	1246741	1905249	1887200	1788354
UDP-nega	37657931	32460643	34102222	27811544	32211987	51980105	50471456	47347020	38905624	43508600	48385212	40655073	45684513	47532511	42890397
Cholic acid	6037.24	3584.29	3030.17	3020.39	6004.94	7646.28	4143.61	1092.15	3800.95	4096.01	1092.15	3884.51	4031.21	1092.15	6484.32
trehalose-6-Phosphate	57767.8	58148	31484.1	26683	18374.4	73408.5	44071.4	64669.8	38985.1	81736	43165.3	27438.4	46552.2	90173.9	54120.5
adenosine 5-phosphosulfate	326459	301929	331532	279188	276562	263880	304455	291489	292024	295410	299022	307442	281661	295918	296406
ADP-nega	9861671	9306385	9312105	8788856	8188731	8219745	8379052	7478163	7775541	7995314	7468506	7306619	7731250	7803998	7332336
dGDP-nega	10081295	9480039	9549474	8086448	8491416	8105297	8530225	7405875	7624461	7663423	7522257	7473024	7836298	7571191	7529138
IDP-nega	1.48383e+06	1.28121e+06	1.2852e+06	1.14749e+06	1.15012e+06	998039	1.15825e+06	1.00417e+06	1.07889e+06	1.07022e+06	1.04868e+06	979880	1.03146e+06	1.13173e+06	1.05152e+06
GDP-nega	484324	360021	440502	374551	404033	304376	302036	305773	264161	291760	335793	248180	315596	322060	334139
CDP-ethanolamine	19436.9	18215.3	18533.6	13360.9	10256.8	14969.3	16331.8	14954	20382.6	25016.3	110135	104000	71002	81430.4	86019.2
FMN	16697.5	19418.8	14561.6	12141.8	18378	16328.8	13610	21774.8	17703.4	12937.4	15329.5	12851.6	9678.25	11290.9	16940.9
cholesteryl sulfate	44295.9	38805.8	31551.6	38223.6	29224	55796.5	46270.3	46272	76894.1	57096.1	116936	182328	100799	107294	82275.3
dCTP-nega	409407	319327	310401	227625	330284	364274	334320	349611	305709	400939	337308	334117	428389	410041	363178
dUTP-nega	251962	208799	217341	135289	166906	141246	101386	52312.8	96712.6	107838	81369.4	67481.4	70879.3	99085.7	73894.8
dTTP-nega	1949181	1.61387e+06	1.3786e+06	1.30006e+06	1.46018e+06	964177	929664	796005	1.0207e+06	1.12546e+06	938359	938544	902067	843746	839691
CTP-nega	6194414	5808441	7091962	6172870	7126047	5001030	5666760	5197923	4811608	6058465	6366065	5381051	6248093	6415518	5566970
UTP-nega	93633097	76540231	90362080	64555105	79274845	68769826	71253397	66759395	56105417	74169632	83848770	64617943	85174477	87214527	75966165
dATP-nega	136561	120724	117198	105611	108033	72138.8	58527.1	54441.1	57247.8	71479.2	93580.3	95201.1	58162	89541.8	79863.2
Taurodeoxycholic acid	4273.43	1092.15	3634.5	1092.15	1092.15	9483.22	4082.3	6789.52	1092.15	6822.77	4056.3	4018.61	5636.03	8053.36	5644.45
ATP-nega	51192095	41590156	40669337	30966839	35771684	31150122	33022984	30112221	26253164	32621519	30151526	27779673	31541511	30333281	28977179
dGTP	51441148	40733754	40956395	30788074	35638849	31218610	32260877	29234238	25484192	30835697	29088892	26516617	30010470	29560190	28462612
GTP-nega	6.79656e+06	5.62703e+06	6.83174e+06	5.24651e+06	6.77173e+06	4.37408e+06	1092.15	3232.69	1092.15	1092.15	1092.15	3.76916e+06	1092.15	5350.39	3.76612e+06
UDP-D-glucose	41075103	40195760	37673087	35641406	40599304	75081802	68453162	66507777	70674923	75656702	42495653	49517562	50548790	49418515	47824326
UDP-D-glucuronate	8680493	6266224	6823762	4702691	6487038	14042031	13376516	11695260	8899244	12102879	10842111	7338793	10692410	9571052	9138533
ADP-D-glucose	114702	117792	128058	77685	94667.3	46360.7	63964.8	48316.7	44230.4	56483.3	23368.1	24198.6	28230.2	33069.2	48408.1
UDP-N-acetyl-glucosamine	12823563	12734173	12620414	12354355	12991884	22962831	24099727	20301899	24064089	24297953	30072380	31606715	29628299	26771838	30635485
glutathione disulfide-nega	83080506	81476723	133184196	142038188	92970136	98054533	109233399	107986589	129947464	113834908	158653548	193551075	188441424	180643880	182990323
NAD_nega	131031	170131	129712	102275	140792	69774.2	43411.1	68803.6	63310.1	66693.9	52532.2	52187.4	63700.1	66822.8	81191.7
NADH-nega	779234	541548	591645	664043	486763	173596	218403	205627	290244	282980	71170.3	93610.7	116994	95196.2	114567
dephospho-CoA-nega	7299.23	6534.96	8491.27	6637.18	12814.9	13545.6	14186.4	10752.8	12894.3	17838.6	1092.15	1092.15	9712.16	1092.15	20235.5
NADP_nega	72223.4	70399.2	52795.4	45508	61294.7	34025.1	39470.6	46282.2	34703.5	40152.3	37103.1	35497.2	45997.6	36507.4	41950.9
NADPH-nega	10919.4	1092.15	15168.9	4246.8	10311.7	6803.79	8165.61	11566.4	4082.8	1092.15	1092.15	1092.15	1092.15	1092.15	1092.15
2-hydroxygluterate	2394426	2369413	2259102	2369563	2286959	2362116	2465482	2551639	2518107	2468897	2323135	2338902	2653887	2321095	2463794
2-deoxyglucose-6-phosphate	19171.1	23956.6	24516.1	29711.3	14594	30218.2	25531.5	21984.8	19845.8	18259.1	22253.2	22490.6	22561.2	24205.5	21558.1
4-phosphopantothenate	14979	17887.7	14749.1	19401.8	14504	10996	14320.1	10181.4	5961.84	7372.7	7893.79	10302.1	12032.3	7960.55	10035.1
dehydroascorbic acid	6066.08	5446.18	1092.15	4245.43	4854.67	1092.15	1092.15	5442.39	1092.15	1092.15	5665.95	4831.77	1092.15	8869.68	1092.15
itaconic acid	179210	173618	173724	180288	156898	183490	168007	166224	171363	143141	112126	129890	148418	194110	127263
